# Supplementary material
Source: bioRxiv or medRxiv preprint supplement (https://www.biorxiv.org/highwire/filestream/54518/field_highwire_adjunct_files/6/178806-4.pdf)

## Supplementary Figure S4

Each of the subsequent pages shows the estimated genetic correlation matrix (left) and the raw phenotypic correlation matrix for different subsets of IDPs. The genetic correlation matrices were calculated using the multi-trait mixed model approach described in the main text using the SBAT software. In some cases, phenotypes were pruned to remove pairs of IDPs with raw correlation greater than 0.9. The intention of these plots is to provide an overview of the levels of raw and genetic correlations that exist between the different IDPs.

# T1 - global volumes

Genetic correlation

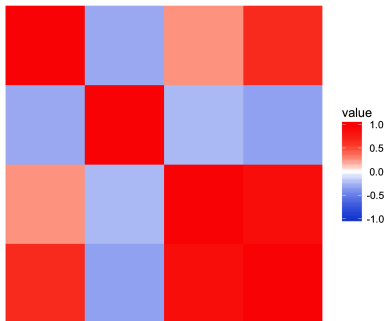

Phenotypic correlation

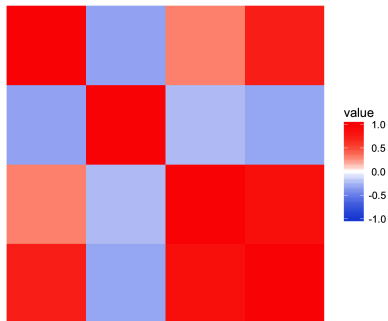

# T1 - sub-cortical volumes

Genetic correlation

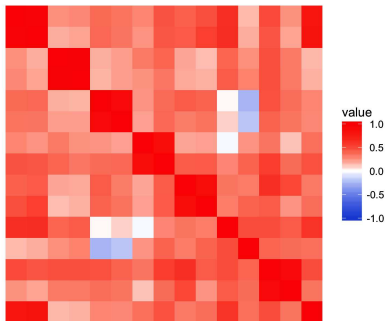

Phenotypic correlation

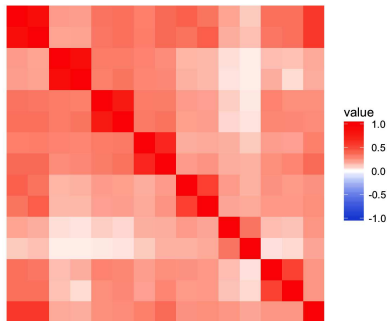

# T1 - Cortex ROIs

Genetic correlation

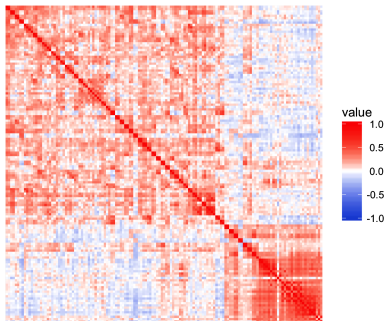

Phenotypic correlation

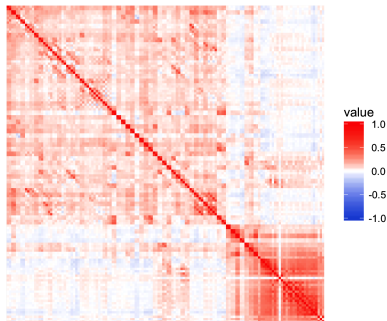

# SWI T2\* sub-cortical

Genetic correlation

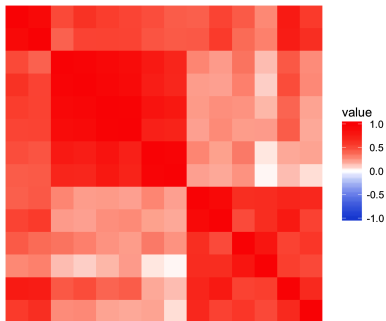

Phenotypic correlation

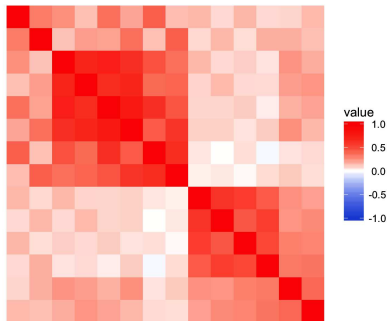



# Diffusion MRI - TBSS

Genetic correlation

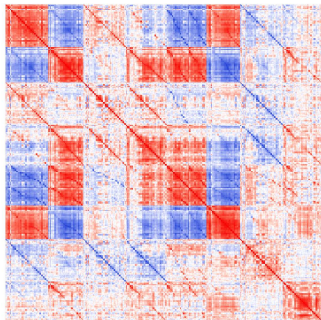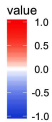

Phenotypic correlation

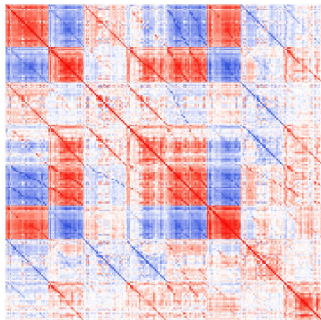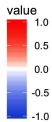

# Diffusion MRI - ProbtrackX

Genetic correlation

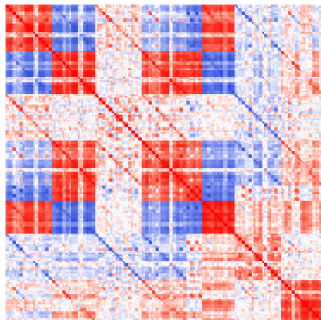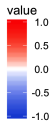

Phenotypic correlation

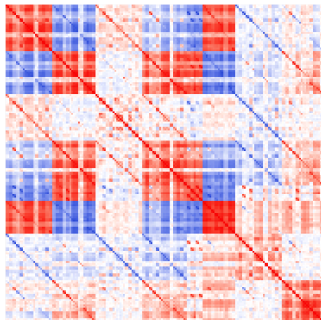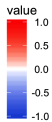



# resting fMRI - parcellation25 amplitudes

Genetic correlation

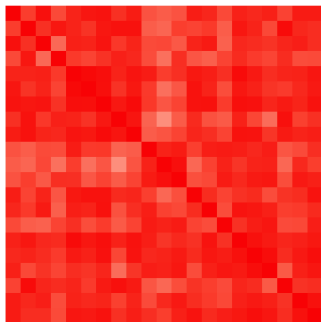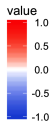

Phenotypic correlation

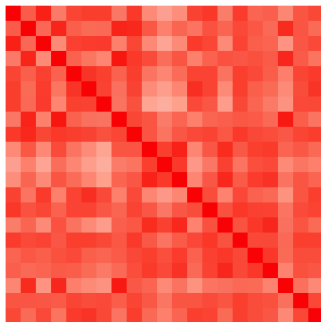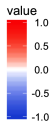

# resting fMRI - parcellation100 amplitudes

Genetic correlation

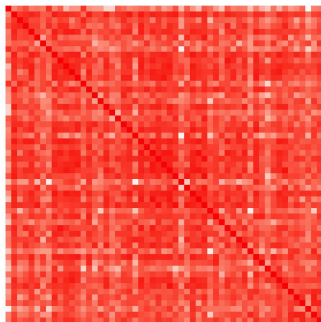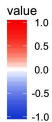

Phenotypic correlation

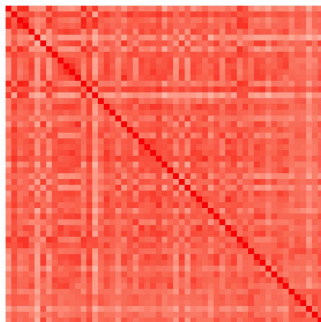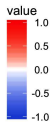

# resting fMRI - parcellation25 edges

Genetic correlation

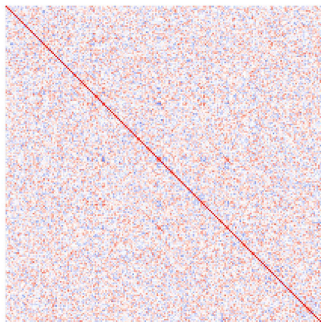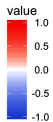

Phenotypic correlation

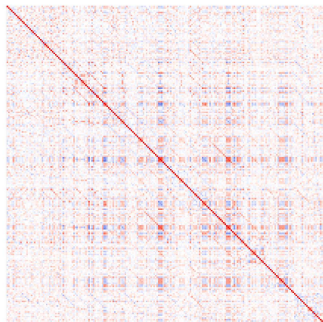

# T1 - sub-cortical volumes L+R

Genetic correlation

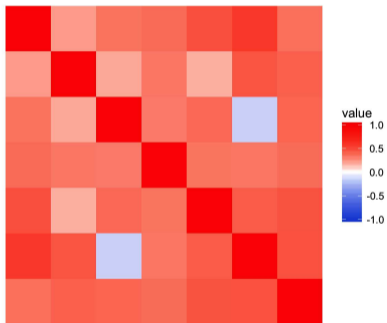

Phenotypic correlation

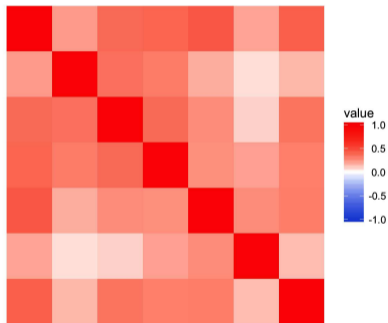

# SWI T2\* sub-cortical L+R

Genetic correlation

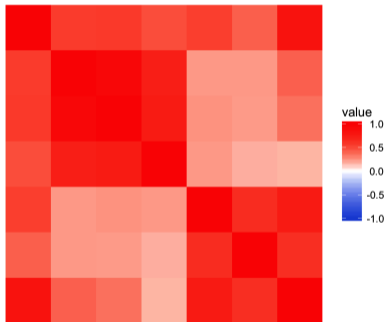

Phenotypic correlation

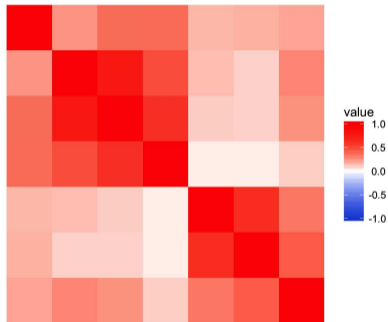

# FreeSurfer

Genetic correlation

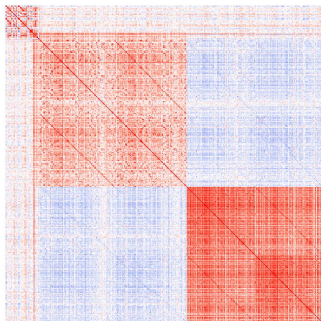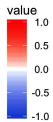

Phenotypic correlation

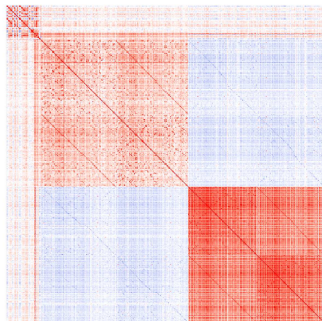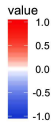

# resting fMRI - ICA features

Genetic correlation

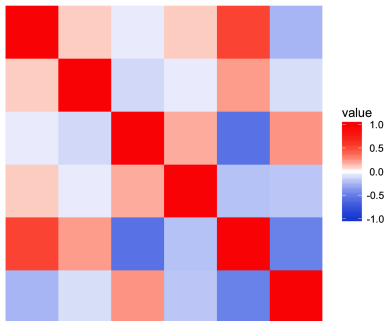

Phenotypic correlation

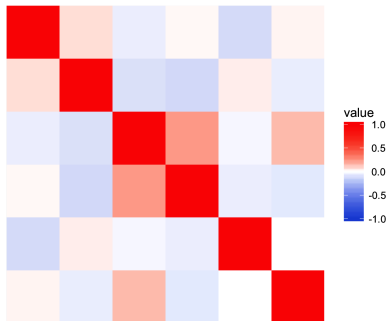

Supplement: Supplementary file [file 178806-4.pdf]
